# Supplementary material
Source: PubMed Central journal article supplement (PMC2780796)
Supplement: 0911046106_0911046106SI.pdf [file 0911046106_0911046106SI.pdf]

# Supporting Information

Moench et al. 10.1073/pnas.0911046106

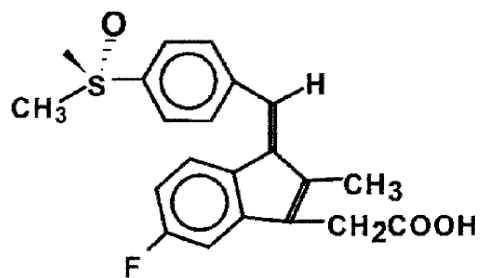

Fig. S1. The structure of sulindac.

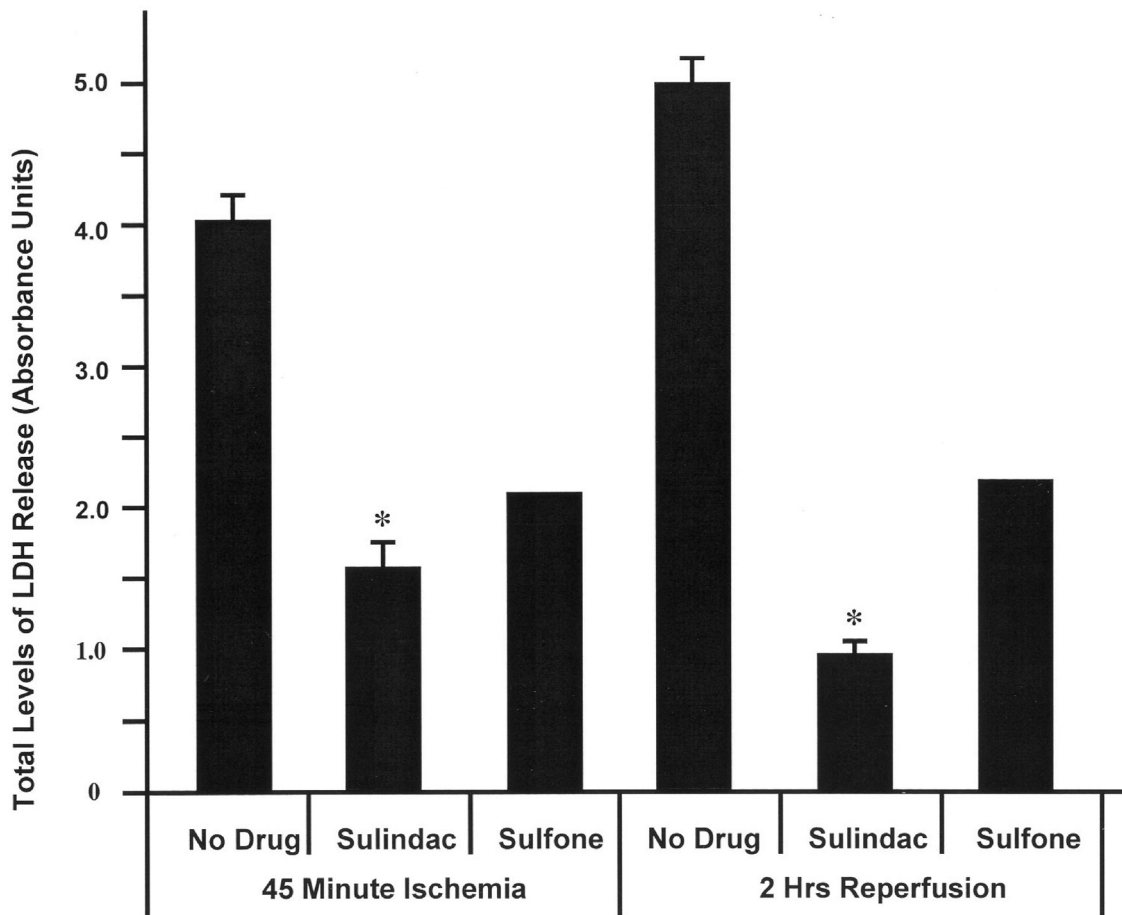

**Fig. S2.** Effect of feeding sulindac sulfone on LDH levels on the Langendorff heart after ischemia and reperfusion. The animals were fed 0.2 mg of sulindac sulfone per day for 2 days. The other experimental conditions are as described in Fig. 2 of the main text.
